# Supplementary material for: Gut Microbiome-Driven Microglial Activation Links Dysbiosis to Pain in Interstitial Cystitis/Bladder Pain Syndrome
Source: Research Square preprint supplement (doi:10.21203/rs.3.rs-9087060/v1), 2026-04-23
Supplement: Supplementary file 2 [file e64533cbd024a343b3406fd2.docx]

**Additional files**

**Additional File 1. Distribution of microglial cytokine secretion by ethnicity among healthy control donors.** Cytokine secretion in response to stool slurry derived from healthy control donors was stratified by donor’s ethnicity. BV2 microglial cell line responses are shown in panels (A–C), enriched primary microglia in panels (D–F), and mixed glial cultures in panels (G–I). TNF-α (A, D, G), RANTES/CCL5 (B, E, H), and IL-6 (C, F, I) concentrations were quantified by ELISA following treatment with 1 µg/mL heat-killed stool slurry. Bars represent mean ± SEM, with individual data points corresponding to independent healthy control stool donors. No significant differences in cytokine secretion were observed across racial/ethnic groups within the healthy control cohort (one-way ANOVA or Kruskal–Wallis test, as appropriate; p > 0.05).

**Additional File 2. Validation of *in vitro* models by immunofluorescence and flow cytometry.** Immunofluorescence staining with Iba1 (green), GFAP (red) and DAPI (blue) was performed on (a) BV2 cells, (b) enriched primary microglia, and (c) mixed glial cultures. *In vitro* models were further validated using flow cytometry using CD11b, F4/80 and P2Y12 microglial markers, and GFAP as astrocytic marker. Representative plots in (d) show unstained (negative control, left) and BV2 (right) samples, with 94.7% CD11b+ F4/80+ and 98.4% CD11b+ P2Y12+ cells. Panel (e) shows 91.3% CD11b+ F4/80+ and 94.6% CD11b+ P2Y12+, while panel (f) shows 66% GFAP+ and 14.8% CD11b+ P2Y12+

**Additional File 3. Multiplex cytokine profiling in enriched primary microglia identifies key inflammatory readouts among 62 analytes**. Supernatants from enriched microglia were analyzed for potential cytokine and chemokine secretion in response to stool slurry from healthy controls (HC) or IC patients (IC), as well as control treatments including untreated, LPS and IL-4 conditions. (a) Representative composite image showing chemiluminescent detection from eight cytokine array membranes analyzed simultaneously. (b) Heatmap of normalized cytokine levels averaged across HC and IC groups, highlighting differential expression of inflammatory mediators.

**Additional File 4. Comparison of cytokine responses between enriched microglia and mixed glia reveals shared trends.** Cytokine secreted from enriched microglia and mixed glia in response to stool slurry from IC/BPS patients were plotted against each other to compare the two responses between the two in vitro models. Strong positive correlations were observed between cytokine levels across models for (a) TNF-⍺, (b) RANTES, and (c) IL-6. Statistical analysis performed using a two-tailed Pearson’s correlation; p<0.05 was considered significant.
